## Vertical Transmission of Zika Virus (Flaviviridae, Flavivirus) in Amazonian *Aedes aegypti* (Diptera: Culicidae) Delays Egg Hatching and Larval Development of Progeny

Barbara Aparecida Chaves,<sup>1,2</sup> Ademir Bentes Vieira Junior,<sup>1</sup> Karine Renata Dias Silveira,<sup>3</sup> Andreia da Costa Paz,<sup>1</sup> Evelyn Beatriz da Costa Vaz,<sup>1</sup> Raphaela Guedes Pereira Araujo,<sup>3</sup> Nilton Barnabe Rodrigues,<sup>3</sup> Thais Bonifacio Campolina,<sup>3</sup> Alessandra da Silva Orfano,<sup>3</sup> Rafael Nacif-Pimenta,<sup>3</sup> Luis Eduardo Martinez Villegas,<sup>3</sup> Fabrício Freire de Melo,<sup>4</sup> Breno de Mello Silva,<sup>5</sup> Wuelton Marcelo Monteiro,<sup>1,2</sup> Maria das Graças Vale Barbosa Guerra,<sup>1,2</sup> Marcus Vinicius Guimarães de Lacerda,<sup>1,6</sup> Douglas Eric Norris,<sup>7</sup> Nagila Francinete Costa Secundino,<sup>3</sup> and Paulo Filemon Paolucci Pimenta<sup>1,3,8</sup>

<sup>1</sup>Tropical Medicine Foundation Dr. Heitor Vieira Dourado, Manaus, Amazonas, Brazil, <sup>2</sup>Amazonas State University, <sup>3</sup>Laboratory of Medical Entomology, Rene Rachou Research Institute – FIOCRUZ, Minas Gerais, Belo Horizonte, Brazil, <sup>4</sup>Multidisciplinary Health Institute, Federal University of Bahia, Bahia, Brazil, <sup>5</sup>Department of Biological Sciences, Federal University of Ouro Preto, Minas Gerais, Ouro Preto, Brazil, <sup>6</sup>Leonidas and Maria Deane Research institute – FIOCRUZ, Amazonas, Brazil, <sup>7</sup>The Harry Feinstone Department of Molecular Microbiology and Immunology, Johns Hopkins Bloomberg School of Public Health, Baltimore, MD, and <sup>8</sup>Corresponding author, e-mail: paulo.pimenta@fiocruz.br

Subject Editor: Andrew van den Hurk

Received 10 December 2018; Editorial decision 2 June 2019

### Abstract

Zika virus (ZIKV) has emerged as a globally important arbovirus and has been reported from all states of Brazil. The virus is primarily transmitted to humans through the bite of an infective *Aedes aegypti* (Linnaeus, 1762) or *Aedes albopictus* (Skuse, 1895). However, it is important to know if ZIKV transmission also occurs from *Ae. aegypti* through infected eggs to her offspring. Therefore, a ZIKV and dengue virus (DENV) free colony was established from eggs collected in Manaus and maintained until the third–fourth generation in order to conduct ZIKV vertical transmission (VT) experiments which used an infectious bloodmeal as the route of virus exposure. The eggs from ZIKV-infected females were allowed to hatch. The resulting F1 progeny (larvae, pupae, and adults) were quantitative polymerase chain reaction (qPCR) assayed for ZIKV. The viability of ZIKV vertically transmitted to F1 progeny was evaluated by cultivation in C6/36 cells. The effects of ZIKV on immature development of *Ae. aegypti* was assessed and compared with noninfected mosquitoes. Amazonian *Ae. aegypti* were highly susceptible to ZIKV infection (96.7%), and viable virus passed to their progeny via VT. Moreover, eggs from the ZIKV-infected mosquitoes had a significantly lower hatch rate and the slowest hatching. In addition, the larval development period was slower when compared to noninfected, control mosquitoes. This is the first study to illustrate VT initiated by oral infection of the parental population by using mosquitoes, which originated from the field and a ZIKV strain that is naturally circulating in-country. Additionally, this study suggests that ZIKV present in the *Ae. aegypti* can modify the mosquito life cycle. The data reported here suggest that VT of ZIKV to progeny from naturally infected females may have a critical epidemiological role in the dissemination and maintenance of the virus circulating in the vector.

**Key words:** Zika virus, vertical transmission, *Aedes aegypti*, fitness cost

Zika virus (ZIKV) was first isolated in 1947 and until 2007, the only reported outbreak had been in Micronesia (Kindhauser et al. 2016). In early 2015, Brazil reported the first case of ZIKV in a

Northeastern state (Zanluca et al. 2015) with rapid expansion to all regions of the country. By 2017, 3,754 probable cases of ZIKV had been registered with an incidence rate of 1.8 cases/1,000 inhabitants

(Brazilian Ministry of Health 2017a). Between November 2015 and May 2017, there were more than 13,000 suspected cases associated with changes in growth and development in newborns, with 2,722 cases confirmed and 3,245 cases still under investigation (Brazilian Ministry of Health 2017b). Currently, ZIKV is circulating in all Brazilian states.

ZIKV is transmissible primarily by mosquitoes, but other types of transmission have already been described, such as by sexual routes (McCarthy 2016). In mosquitoes, a mechanism that may contribute to virus survival through adverse conditions is vertical transmission (VT), when infected females pass the virus to her eggs/embryos and the resulting offspring (Ferreira-de-brito et al. 2016, Smartt et al. 2017). ZIKV is a member of the Flaviviridae family related to arboviruses such as West Nile virus, yellow fever virus and dengue virus (DENV) that can be transmitted from one mosquito generation to the next via VT (Rosen et al. 1983, Fontenille et al. 1997, Nelms et al. 2013).

The most important mechanism for the spread of ZIKV, and the resulting human disease, is the typical horizontal transmission via the bite of an infected *Aedes aegypti*, the primary vector (Kindhauser et al. 2016). However, it is essential to understand if infected *Ae. aegypti* are capable of VT of ZIKV. This may serve as a mechanism for maintaining ZIKV in the vectors in the absence of available or susceptible vertebrate hosts. In this report, we utilized newly colonized Brazilian *Ae. aegypti* and demonstrated the VT of ZIKV from orally infected female mosquitoes to their progeny, and illustrated that ZIKV infection also constrains the normal mosquito development.

## Materials and Methods

### Ethic Approval

This study was conducted in accordance with recommendations from the Manual for the Use of Animals (FIOCRUZ, Ministry of Health of Brazil, National decree, Nr. 3179) and approved by the Ethics Committee for the Use of Animals of Fundação Oswaldo Cruz (FIOCRUZ, Ministry of Health of Brazil, Nr. L-1715). This protocol was authorized by the Ethics in Animal Use Committee of Tropical Medicine Foundation Dr. Heitor Vieira Dourado, Manaus – AM, Brazil (protocol number 002380/2016).

### *Ae. aegypti* Collection

Two thousand five hundred eggs were collected in the field using ovitraps in a ZIKV endemic area of Manaus, the capital city of the state of Amazonas, and allowed to hatch, all larvae were identified as *Ae. aegypti*. A subsample of 100 randomly chosen larvae was verified to be ZIKV and DENV-free by quantitative polymerase chain reaction (qPCR). The resulting virus-free adult mosquitoes were reared as described previously (Gonçalves et al. 2014) and used to establish a third–fourth generation to conduct ZIKV infection experiments.

### ZIKV and Mosquito Infection

A human isolate of ZIKV from the State of São Paulo, Brazil (ZIKV/H. sapiens/Brazil/SPH/2015) was used to infect the mosquitoes (Cunha et al. 2016). Virus stocks were passaged and maintained in an *Aedes albopictus* clone C6/36 cell line (ATCC - CRL-1660) as previously described (Gonçalves et al. 2014). Virus titration followed the TCID<sub>50</sub> method (Reed and Muench 1938). Two hundred, 3–5 d old, inseminated *Ae. aegypti* females were infected orally via glass feeding devices filled with ZIKV-infected C6/36 cell culture supernatant re-suspended in 2:1 fresh mouse blood with

heparin (Gonçalves et al. 2014). The ZIKV titer of  $5 \times 10^5$  PFU/ml was determined using Vero cell line by plaque assay. A control group of *Ae. aegypti* females was treated using the same conditions as the tested ZIKV-infected female group, but fed with a normal bloodmeal. Mosquitoes were allowed to feed for 1 h and 150 fully engorged females from each group were separated and maintained on 10% glucose solution ad libitum.

### VT of ZIKV to the *Ae. aegypti* Progeny

Four days post infection (4 d.p.i.), 30 mosquitoes were randomly selected from the two experimental groups. Each mosquito was placed into a small individual cage and allowed to oviposit over the following 3 d. On the 7 d.p.i., the parental infected mosquitoes were individually evaluated for ZIKV by qPCR (Secundino et al. 2017). Four days after the oviposition, eggs from positive females (ZIKV-infected) and control mosquitoes were separated into two groups and placed in small cups to observe individual hatching. The resulting F1 larvae (L3–L4) were randomly placed into sixty groups of 10 ( $n = 600$ ). Twenty individuals at each distinct developmental stage (larvae, pupae, and adults,  $n = 200$ ) of these two groups were assayed for ZIKV by qPCR as 10 single pools. Individuals of each stage were chosen randomly regardless of sex.

### Effect of VT-ZIKV on *Ae. aegypti* Developmental Stages

Thirty parentally ZIKV-infected *Ae. aegypti* were randomly selected and allowed to oviposit in order for us to evaluate the number of laid eggs, time to hatch, and period of larval development until pupation of the infected F1 progeny. Larvae and pupae were counted every day since the eggs hatched. The data were compared with the control group. The two groups were kept in the same room, and in the identical controlled conditions (temperature [28°C], humidity [80%], food availability, and breeding container).

### Viability of VT-ZIKV to the Progeny

Fifteen F1 VT-ZIKV *Ae. aegypti* adults were grouped into three pools of five individuals and macerated in L-15 medium with 1% Penicillin/Streptomycin (10,000 U/ml), 2.5 g/ml Amphotericin B and 2% FBS, cultivated in C6/36 cells for 5 d as described above for observation of ZIKV growth and cytopathic effect (CPE; Contreras and Arumugaswami 2016). The ZIKV-free mosquitoes were used as negative control and inoculated in cell culture at the same time as test mosquitoes.

### VT-ZIKV Detection and Quantification by qPCR

Samples were processed for RNA extraction (QIAamp viral RNA Mini kit, Qiagen, Hilden, Germany) (Lanciotti et al. 2008). Reverse transcription with cDNA production was carried out using a random primer and M-MLV enzyme, and subsequent TaqMan-based qPCR assay for ZIKV (primers set ZIKV 1086 and ZIKV 1162c) (Lanciotti et al. 2008, Secundino et al. 2017). Standard curve used was from gBlocks Gene Fragments dilutions, range 30,000 to 3 copies.

### Statistical Analyses

Shapiro Wilk and two-tailed Student's *t*-tests were used to evaluate significance among the groups in relation to mean numbers of laid eggs. Differences in numbers of hatched eggs among groups were evaluated using two-tailed  $\chi^2$  or Fisher's tests. Period of time to egg hatching and development time of the larvae until pupation were

analyzed using a Kaplan-Meier (log-rank) analysis,  $P$  values  $\leq 0.05$  were considered significant. Statistical analysis was performed in GraphPad Prism, version 5.00 (San Diego, CA) and Stata (Stata Statistical Software, version 13.0).

## Results

### ZIKV Infection of the Amazonian *Ae. aegypti* and Vertical and Trans-stadial Transmission in the Progeny

The Amazonian *Ae. aegypti* were very susceptible to ZIKV infection. Individual qPCR analysis of the 7 d.p.i mosquitoes revealed an infection rate (IR) of 96.7% (29/30) with a median (md) =  $1.3 \times 10^6$  ZIKV cDNA copies/mosquito. The analysis of a total of 600 F1 individuals in 20 pools per life stage demonstrated high filial infection rates (FIR) due to VT of ZIKV as follows: 55% in larvae (11 out of 20 pools) md =  $2.5 \times 10^2$  ZIKV cDNA copies, 50% in pupae (10 out of 20 pools) md =  $1.9 \times 10^2$  ZIKV cDNA copies and 70% in adults (14 out of 20 pools) md =  $1.7 \times 10^2$  ZIKV cDNA copies. Trans-stadial transmission (i.e., presence of ZIKV from one life stage to the next), showed the minimum filial infection rates (MFIR) to be 1:18 in larvae, 1:20 in pupae, and 1:14.3 in adults (Table 1 and Fig. 1).

### Effect of VT-ZIKV and Trans-stadial Infection in the Development of Amazonian *Ae. aegypti*

Out of the 30 selected parental ZIKV-infected *Ae. aegypti*, 29 of these laid 2,853 eggs while the same number of the control mosquitoes laid 2,672 eggs (one female in each group died before laying eggs), of these 2,215 and 2,214 hatched, respectively. The mean number of laid eggs by each ZIKV-infected and control mosquitoes were 98.36 ( $\pm 22.20$ ) and 92.14 ( $\pm 26.44$ ), respectively, with no significant

difference in oviposition rates (Fig. 2a). The eclosion rates (number of eggs hatched/number of eggs laid) were 82.9% for control and 77.6% for VT-ZIKV-infected mosquitoes, which was statically significant ( $P < 0.001$ ) (Fig. 2b).

### Fitness Costs of VT-ZIKV-infected *Ae. aegypti* Progeny

The fitness costs of the VT-ZIKV-infected F1 *Ae. aegypti* progeny were measured using survivorship curves following the Kaplan-Meier method and tested for significance by Log-rank test ( $P < 0.05$ ). The number of eggs hatched daily and the period of larval development to pupae was compared between the VT-ZIKV-infected and control mosquitoes. Differences in the hatch rate occurred in the first 10 d. The VT-ZIKV group had the slowest hatching and the larval development period (eclosion to pupation) compared with control group ( $P < 0.001$ ; Fig. 3a and b).

### Viability of VT-ZIKV of the *Ae. aegypti* Progeny

The supernatant of macerated F1 adult mosquitoes was evaluated for viable ZIKV by cell cultures. Orally infected VT-ZIKV *Ae. aegypti* F1 of the progeny was able to infect C6/36 cell cultures and CPE was observed at 5 d.p.i. (Fig. 4).

## Discussion

The first two cases of ZIKV were confirmed in Manaus, State of Amazonas, in January 2016. In 2017, 1 yr later, the city confirmed 4,418 Zika cases including 500 pregnant women and five microcephaly cases in newborns (Semsá 2017). It is astonishing how quickly ZIKV spread through the city and improving our understanding of ZIKV dispersal and transmission is critical. Today, it is

**Table 1.** ZIKV infection of *Aedes aegypti* and F1 progeny

| Parental     |                                       | F1 progeny |                           |                      |                   |                                       |
|--------------|---------------------------------------|------------|---------------------------|----------------------|-------------------|---------------------------------------|
| IR (%)       | Median cDNA copies $\pm$ SD           | Stage      | N° pools (10 individuals) | FIR <sup>a</sup> (%) | MFIR <sup>b</sup> | Median cDNA copies $\pm$ SD           |
| 29/30 (96.7) | $1.3 \times 10^6 \pm 1.4 \times 10^7$ | Larvae     | 20                        | 11/20 (55)           | 1:18.2            | $2.5 \times 10^2 \pm 2.1 \times 10^3$ |
|              |                                       | Pupae      | 20                        | 10/20 (50)           | 1:20.0            | $1.9 \times 10^2 \pm 8.3 \times 10^2$ |
|              |                                       | Adult      | 20                        | 14/20 (70)           | 1:14.3            | $1.7 \times 10^2 \pm 2.9 \times 10^2$ |

<sup>a</sup>Filial infection rate.

<sup>b</sup>Minimum filial infection rate.

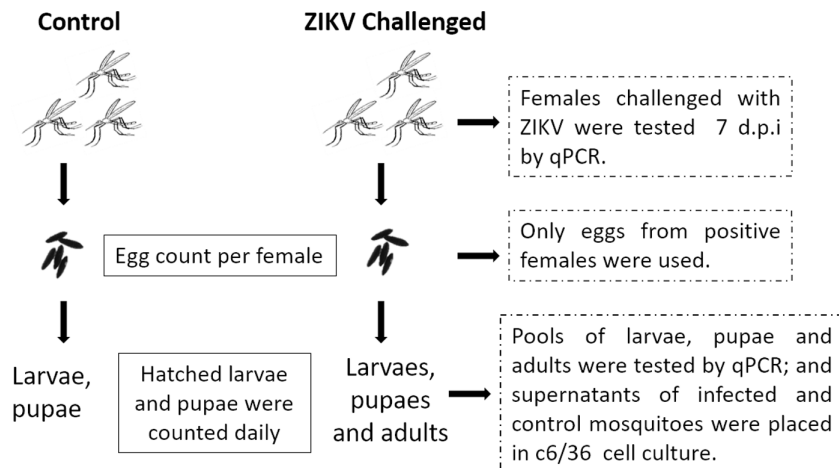

**Fig. 1.** Schematic representation of the experimental design.

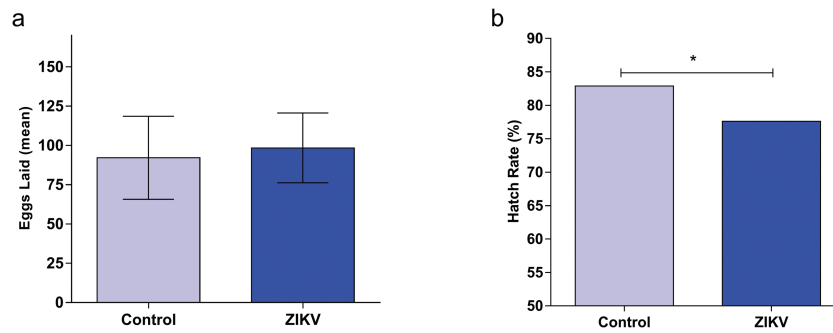

**Fig. 2.** Evaluation of number of eggs laid and hatched for *Ae. aegypti* infected with ZIKV. (a) Mean number of eggs laid; (b) Egg hatch rate.

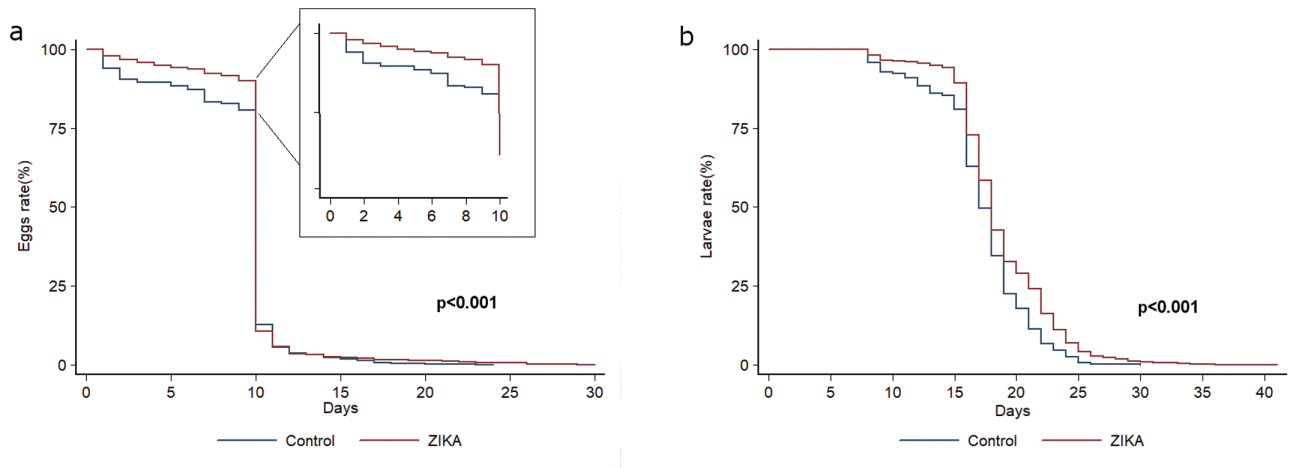

**Fig. 3.** The fitness cost of *Ae. aegypti* progeny derived from ZIKV-infected mosquitoes compared with the control. (a) Analysis of number of eggs hatched daily illustrates difference in the hatch rate happened in the first 10 d, ZIKV group has the slowest hatching. (b) Larval development time from hatching to pupation was longer for ZIKV-infected individuals. (Kaplan-Meier [log-rank] analysis,  $P$  values  $\leq 0.05$  were considered significant).

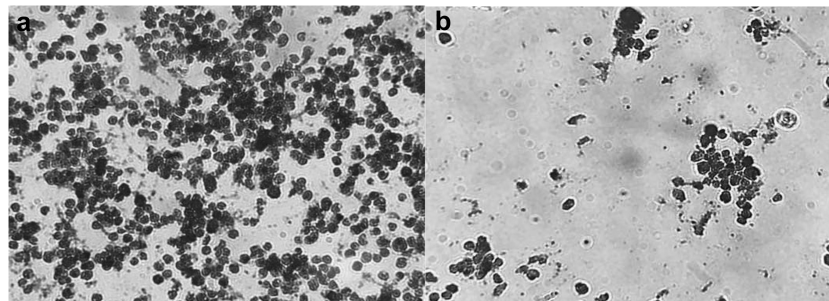

**Fig. 4.** Light microscopy of uninfected and ZIKV-infected C6/36 cell monolayers, 5 days post inoculum. (a) Uninfected C6/36 cells in a typical monolayer. (b) C6/36 cultivated with the supernatants of the adult F1 progeny derived from the ZIKV-infected parental mosquitoes reveal significant cytopathic effect with the formation of large syncytia.

well known that ZIKV behaves differently from other Flaviviruses since it is capable of being transmitted sexually between humans via its presence in body fluids such as semen and urine, and in the female genital tract (Baud et al. 2017).

In cities like Manaus, several factors such as unplanned urban expansion, irregular or absence of waste collection, and poor socioeconomic conditions contribute to the development of breeding sites and subsequent increases in the *Ae. aegypti* populations. Previously, only two studies, using mosquitoes from Rio de Janeiro, a Southeastern city, described the susceptibility of Brazilian *Ae. aegypti* to ZIKV. The first study reports a high infection and disseminated IR (Dutra et al. 2016), which is similar to our findings. The second study

reports a high IR, but with low levels of disseminated infection in recently colonized *Ae. aegypti* (Chouin-Carneiro et al. 2016). Since we worked with a mosquito population from Manaus, a Northern city, these differences may reflect the genetic or physiological variability in the permissiveness of these geographically different *Ae. aegypti* populations.

The Amazonian *Ae. aegypti* mosquitoes are highly susceptible to oral ZIKV infection and we verified the VT to their progeny. The MFIR of the larvae and adults of the *Ae. aegypti* was greater than other studies describing VT in other populations (Thangamani et al. 2016, Ciota et al. 2017). It is worth noting that, in the previous VT studies, the infections were artificially initiated via intra-thoracic

injection by syringe, however, our study was the first one to demonstrate the VT-ZIKV by natural oral infection of the parental mosquitoes. Additionally, this study used third and fourth generations of *Ae. aegypti* from eggs collected in the field, infected with a ZIKV strain that is naturally circulating in the country. In 2016, a study in Rio de Janeiro Brazil showed for the first time that among 963 *Ae. aegypti* males only one was naturally infected with ZIKV by venereal and/or VT (Ferreira-de-Brito et al. 2016). Certainly, this experimental model is a more accurate reflection of how efficiently VT-ZIKV mosquitoes occur in an endemic region.

Many studies have shown that pathogens, including arboviruses transmitted by insects, can affect vector fitness mainly related to their physiology (Power 1992, Keating et al. 2013). Decreased fecundity and fertility of DENV infected parental *Ae. aegypti* and lengthening of the larval development period of VT-DENV infected progeny have been reported (Joshi et al. 2002, Maciel-de-Freitas et al. 2011). In addition, our study shows that ZIKV infection also alters *Ae. aegypti*'s physiology, e.g., by delaying hatching of the eggs and by changing the larvae stage. Essentially, there is no significant difference in the number of laid eggs by ZIKV-infected parental *Ae. aegypti* compared to the noninfected mosquitoes, but a decrease in egg eclosion rate occurred, and the larval development period of the VT-ZIKV-infected progeny increased.

Our results show that ZIKV infection in *Ae. aegypti* has the potential to modify the mosquito life cycle by increasing the time of two major life stages: egg eclosion and larval development. The data reported here suggest that VT of ZIKV to progeny from naturally infected females may have a critical role in the dissemination and maintenance of the virus circulating in the vector.

VT occurs, but with a small number of cDNA viral copies in VT-ZIKV-infected progeny, similar to a study with VT-DENV-1 in *Ae. aegypti* and *Ae. albopictus* (Buckner et al. 2013). These are important aspects that need to be explored further in the context of urban vector-borne disease dispersal since they can have a significant epidemiological impact. The developmental delays in immature vector mosquitoes and the decrease in the eggs hatching rate induced by ZIKV infection may make the mosquito more vulnerable to vector control of immature stages. This kind of information about vector biology is important for directing interventions in vector control; and this can influence the dispersion and incidence of the disease. If *Ae. aegypti* mosquitoes emerge already infected and are capable of transmitting ZIKV to humans, the potential risk is dramatically increased, especially for populations already bearing the brunt of ongoing epidemics. Thus, it is necessary to develop complementary studies to evaluate vector competence of ZIKV-infected progeny, as well as gaining a better understanding of how many generations ZIKV can be maintained for via VT in field populations of permissive vectors.

## Acknowledgments

This study was partially funded by the following Brazilian agencies: Foundation of the Institute Oswaldo Cruz (FIOCRUZ), Strategic Program for Supporting Health Research (PAPES VI), Brazilian Council for Scientific and Technological Development (CNPq/MS/CAPES/DECIT), Program Science without Borders, INCT-Instituto Nacional de Ciencia e Tecnologia - Entomologia Molecular, Minas Gerais State Research Support Foundation (FAPEMIG), and Amazonas State Research Support Foundation (FAPEAM). Support Program to Young Ph.D. Professors - Federal University of Bahia (PROPESQ/UFBA). N.E.C.S., M.V.G.L., M.G.V.B.G., and P.F.P.P. are research fellows, supported by CNPq. B.A.C., T.B.C., A.S.O., E.B.C.V., and N.B.R. are student fellows supported by CAPES and K.R.D.S., L.E.M.V., and R.N.P. are supported by CNPq; A.C.P. and A.B.V.J. are supported by FAPEAM.

## References Cited

- Baud, D., D. J. Gubler, B. Schaub, M. C. Lanteri, and D. Musso. 2017. An update on Zika virus infection. *Lancet*. 390: 2099–2109.
- Brazilian Ministry of Health. 2017a. Monitoramento dos casos de dengue, febre de chikungunya e febre pelo vírus Zika até a Semana Epidemiológica 4, 2017 (Portuguese). [http://combateades.saude.gov.br/images/pdf/2017-Dengue\\_Zika\\_Chikungunya-SE4.pdf](http://combateades.saude.gov.br/images/pdf/2017-Dengue_Zika_Chikungunya-SE4.pdf).
- Brazilian Ministry of Health. 2017b. Monitoramento integrado de alterações no crescimento e desenvolvimento relacionadas à infecção pelo vírus Zika e outras etiologias infecciosas, até a Semana Epidemiológica 18/2017 (Portuguese). <http://portalarquivos.saude.gov.br/images/pdf/2017/junho/01/BE-2017-015-Monitoramento-integrado-de-alteracoes-no-crescimento-e-desenvolvimento.pdf>.
- Buckner, E. A., B. W. Alto, and L. P. Lounibos. 2013. Vertical transmission of key West dengue-1 virus by *Aedes aegypti* and *Aedes albopictus* (Diptera: Culicidae) mosquitoes from Florida. *J. Med. Entomol.* 50: 1291–1297.
- Chouin-Carneiro, T., A. Vega-Rua, M. Vazeille, A. Yebakima, R. Girod, D. Goindin, M. Dupont-Rouzeyrol, R. Lourenço-de-Oliveira, and A. B. Failloux. 2016. Differential susceptibilities of *Aedes aegypti* and *Aedes albopictus* from the Americas to Zika virus. *Plos Negl. Trop. Dis.* 10: e0004543.
- Ciota, A. T., S. M. Bialosuknia, D. J. Ehrbar, and L. D. Kramer. 2017. Vertical transmission of Zika virus by *Aedes aegypti* and *Ae. albopictus* mosquitoes. *Emerg. Infect. Dis.* 23: 880–882.
- Contreras, D., and V. Arumugaswami. 2016. Zika Virus Infectious Cell Culture System and the In Vitro Prophylactic Effect of Interferons. *JoVE*. (114), 54767.
- Cunha, M. S., D. L. A. Esposito, I. M. Rocco, A. Y. Maeda, F. G. S. Vasami, J. S. Nogueira, R. P. de Souza, A. Suzuki, M. Addas-Carvalho, M. de L. Barjas-Castro, et al. 2016. First complete genome sequence of Zika virus (Flaviviridae, Flavivirus) from an autochthonous transmission in Brazil. *Genome Announc.* 4: e00032–16.
- Dutra, H. L., M. N. Rocha, F. B. Dias, S. B. Mansur, E. P. Caragata, and L. A. Moreira. 2016. Wolbachia blocks currently circulating Zika Virus Isolates in Brazilian *Aedes aegypti* Mosquitoes. *Cell Host Microbe* 19: 771–774.
- Ferreira-de-brito, A., I. P. Ribeiro, R. M. De Miranda, R. S. Fernandes, S. S. Campos, K. Antunes, M. G. De Castro, M. C. Bonaldo, P. Brasil, and R. Lourenço-de-oliveira. 2016. First detection of natural infection of *Aedes aegypti* with Zika virus in Brazil and throughout South America. *Mem. Inst. Oswaldo Cruz.* 111: 655–658.
- Fontenille, D., M. Diallo, M. Mondo, M. Ndiaye, and J. Thonnon. 1997. First evidence of natural vertical transmission of yellow fever virus in *Aedes aegypti*, its epidemic vector. *Trans. R. Soc. Trop. Med. Hyg.* 91: 533–535.
- Gonçalves, C. M., F. F. Melo, J. M. Bezerra, B. A. Chaves, B. M. Silva, L. D. Silva, J. E. Pessanha, J. R. Arias, N. F. Secundino, D. E. Norris, et al. 2014. Distinct variation in vector competence among nine field populations of *Aedes aegypti* from a Brazilian dengue-endemic risk city. *Parasit. Vectors.* 7: 320.
- Joshi, V., D. T. Mourya, and R. C. Sharma. 2002. Persistence of dengue-3 virus through transovarial transmission passage in successive generations of *Aedes aegypti* mosquitoes. *Am. J. Trop. Med. Hyg.* 67: 158–161.
- Keating, J. A., D. Bhattacharya, S. S. Rund, S. Hoover, R. Dasgupta, S. J. Lee, G. E. Duffield, and R. Striker. 2013. Mosquito protein kinase G phosphorylates flavivirus NS5 and alters flight behavior in *Aedes aegypti* and *Anopheles gambiae*. *Vector Borne Zoonotic Dis.* 13: 590–600.
- Kindhauser, M. K., T. Allen, V. Frank, R. S. Santhana, and C. Dye. 2016. Zika: the origin and spread of a mosquito-borne virus. *Bull. World Health Organ.* 94: 675–686C.
- Lanciotti, R. S., O. L. Kosoy, J. J. Laven, J. O. Velez, A. J. Lambert, A. J. Johnson, S. M. Stanfield, and M. R. Duffy. 2008. Genetic and serologic properties of Zika virus associated with an epidemic, Yap State, Micronesia, 2007. *Emerg. Infect. Dis.* 14: 1232–1239.
- Maciel-de-Freitas, R., J. C. Koella, R. Lourenço-de-Oliveira, R. Lourenc, and R. Lourenço-de-Oliveira. 2011. Lower survival rate, longevity and fecundity of *Aedes aegypti* (Diptera: Culicidae) females orally challenged with dengue virus serotype 2. *Trans. R. Soc. Trop. Med. Hyg.* 105: 452–458.

- McCarthy, M. 2016. Zika virus was transmitted by sexual contact in Texas, health officials report. *BMJ*. 352: i720.
- Municipal Health Secretariat (Sems) Manaus City Hall. 2017. 68o Informe Epidemiologico (In Portuguese). <http://semsa.manaus.am.gov.br/semsa-divulga-68o-informe-epidemiologico-do-zika-virus/>
- Nelms, B. M., E. Fechter-Leggett, B. D. Carroll, P. Macedo, S. Klueh, and W. K. Reisen. 2013. Experimental and natural vertical transmission of West Nile virus by California *Culex* (Diptera: Culicidae) mosquitoes. *J. Med. Entomol.* 50: 371–378.
- Power, A. G. 1992. Patterns of virulence and benevolence in insect-borne pathogens of plants. *CRC. Crit. Rev. Plant Sci.* 11: 351–372.
- Reed, L. J. and H. Muench. 1938. Muench H: A simple method of estimating fifty percent endpoints. *Am. J. Hyg.* 27: 493–497.
- Rosen L., D. A. Shroyer, R. B. Tesh, J. E. Freier and J. C. Lien. 1983. Transovarial transmission of dengue viruses by mosquitoes: *Aedes albopictus* and *Aedes aegypti*. *Am. J. of Trop. Med. Hyg.* 32: 1108–1119
- Secundino, N. F. C., B. A. Chaves, A. S. Orfano, K. R. D. Silveira, N. B. Rodrigues, T. B. Campolina, R. Nacif-Pimenta, L. E. M. Villegas, B. M. Silva, M. V. G. Lacerda, et al. 2017. Zika virus transmission to mouse ear by mosquito bite: a laboratory model that replicates the natural transmission process. *Parasit. Vectors.* 10: 346.
- Smartt, C. T., T. M. S. Stenn, T. Y. Chen, M. G. Teixeira, E. P. Queiroz, L. Souza Dos Santos, G. A. N. Queiroz, K. Ribeiro Souza, L. Kalabric Silva, D. Shin, et al. 2017. Evidence of Zika virus RNA fragments in *Aedes albopictus* (Diptera: Culicidae) field-collected eggs from Camaçari, Bahia, Brazil. *J. Med. Entomol.* 54: 1085–1087.
- Thangamani, S., J. Huang, C. E. Hart, H. Guzman, and R. B. Tesh. 2016. Vertical Transmission of Zika Virus in *Aedes aegypti* Mosquitoes. *Am. J. Trop. Med. Hyg.* 95: 1169–1173.
- Zanluca, C., V. C. Melo, A. L. Mosimann, G. I. Santos, C. N. Santos, and K. Luz. 2015. First report of autochthonous transmission of Zika virus in Brazil. *Mem. Inst. Oswaldo Cruz.* 110: 569–572.
